# Supplementary material for: Mechanistic investigation of 1,3-dipolar cycloaddition between bifunctional 2-pyridylselenyl reagents and nitriles including reactions with cyanamides
Source: Royal Society of Chemistry journal article supplement (doi:10.1039/d3ce00385j), 2023-01-01
Supplement: d3ce00385j1.pdf [file d3ce00385j1.pdf]

## Supporting Information

### Mechanistic investigation of 1,3-Dipolar Cycloaddition between Bifunctional 2-Pyridylselenyl Reagents and Nitriles Including Reactions with Cyanamides

Alexey A. Artemjev,<sup>a</sup> Alexey S. Kubasov,<sup>b</sup> Maxim L. Kuznetsov,<sup>c</sup> Mariya V. Grudova,<sup>d</sup> Victor N. Khrustalev,<sup>a,d</sup> Andreii S. Kritchenkov<sup>a</sup> and Alexander G. Tskhovrebov<sup>\*a</sup>

*a* Peoples' Friendship University of Russia, 6 Miklukho-Maklaya Street, Moscow, 117198,  
Russian Federation

*b* Kurnakov Institute of General and Inorganic Chemistry, Russian Academy of Sciences,  
Leninsky Prosp. 31, Moscow, Russian Federation

*c* Centro de Química Estrutural, Institute of Molecular Sciences, Departamento de Engenharia  
Química, Instituto Superior Técnico, Universidade de Lisboa, Av. Rovisco Pais, 1049-001 Lisboa,  
Portugal

*d* N.D. Zelinsky Institute of Organic Chemistry, Russian Academy of Sciences, 47 Leninsky  
Prosp., Moscow, Russian Federation

**Table S1.** Crystal data and structure refinement for all compounds studied.

| Compound                             | <b>1</b>                                                            | <b>3</b>                                                            | <b>4</b>                                                            | <b>5</b>                                                            |
|--------------------------------------|---------------------------------------------------------------------|---------------------------------------------------------------------|---------------------------------------------------------------------|---------------------------------------------------------------------|
| Empirical formula                    | C <sub>8</sub> H <sub>10</sub> ClN <sub>3</sub> Se                  | C <sub>13</sub> H <sub>12</sub> ClN <sub>3</sub> OSe                | C <sub>16</sub> H <sub>12</sub> ClN <sub>3</sub> Se                 | C <sub>10</sub> H <sub>14</sub> ClN <sub>3</sub> O <sub>2</sub> Se  |
| Formula weight                       | 262.60                                                              | 340.67                                                              | 360.70                                                              | 322.65                                                              |
| Temperature/K                        | 120.00                                                              | 100.00                                                              | 300.00                                                              | 100.00                                                              |
| Crystal system                       | monoclinic                                                          | orthorhombic                                                        | tetragonal                                                          | monoclinic                                                          |
| Space group                          | P2 <sub>1</sub> /c                                                  | P2 <sub>1</sub> 2 <sub>1</sub> 2 <sub>1</sub>                       | P4 <sub>1</sub>                                                     | P2 <sub>1</sub> /c                                                  |
| a/Å                                  | 7.3227(9)                                                           | 6.9994(10)                                                          | 7.811(4)                                                            | 5.3306(7)                                                           |
| b/Å                                  | 8.9950(14)                                                          | 8.8877(10)                                                          | 7.811                                                               | 14.043(4)                                                           |
| c/Å                                  | 15.321(2)                                                           | 20.694(5)                                                           | 23.699(8)                                                           | 16.798(2)                                                           |
| β/°                                  | 103.442(6)                                                          | 90                                                                  | 90                                                                  | 93.025(4)                                                           |
| Volume/Å <sup>3</sup>                | 981.5(2)                                                            | 1287.3(4)                                                           | 1445.9(14)                                                          | 1255.7(4)                                                           |
| Z                                    | 4                                                                   | 4                                                                   | 4                                                                   | 4                                                                   |
| ρ <sub>calc</sub> /g/cm <sup>3</sup> | 1.777                                                               | 1.758                                                               | 1.657                                                               | 1.707                                                               |
| μ/mm <sup>-1</sup>                   | 4.053                                                               | 3.118                                                               | 2.777                                                               | 3.197                                                               |
| F(000)                               | 520.0                                                               | 680.0                                                               | 720.0                                                               | 648.0                                                               |
| Crystal size/mm <sup>3</sup>         | 0.4 × 0.2 × 0.01                                                    | 0.6 × 0.4 × 0.03                                                    | 0.6 × 0.5 × 0.4                                                     | 0.6 × 0.02 × 0.02                                                   |
| Radiation                            | MoKα (λ = 0.71073)                                                  |
| 2θ range /°                          | 4.528 - 51.988                                                      | 4.988 - 59.992                                                      | 5.216 - 54.93                                                       | 3.782 - 54.974                                                      |
| Index ranges                         | -9 ≤ h ≤ 8<br>-11 ≤ k ≤ 10<br>-15 ≤ l ≤ 18                          | -9 ≤ h ≤ 9<br>-12 ≤ k ≤ 9<br>-29 ≤ l ≤ 16                           | -10 ≤ h ≤ 9<br>-10 ≤ k ≤ 10<br>-30 ≤ l ≤ 30                         | -6 ≤ h ≤ 6<br>-14 ≤ k ≤ 18<br>-21 ≤ l ≤ 21                          |
| Reflections collected                | 5237                                                                | 6508                                                                | 12885                                                               | 6030                                                                |
| Independent reflections              | 1935<br>[R <sub>int</sub> = 0.0245,<br>R <sub>sigma</sub> = 0.0300] | 3641<br>[R <sub>int</sub> = 0.0319,<br>R <sub>sigma</sub> = 0.0628] | 3287<br>[R <sub>int</sub> = 0.0234,<br>R <sub>sigma</sub> = 0.0359] | 2763<br>[R <sub>int</sub> = 0.0242,<br>R <sub>sigma</sub> = 0.0383] |
| Goodness-of-fit on F <sup>2</sup>    | 1.241                                                               | 1.015                                                               | 1.114                                                               | 1.025                                                               |
| Final R indexes [I ≥ 2σ (I)]         | R <sub>1</sub> = 0.0265,<br>wR <sub>2</sub> = 0.0648                | R <sub>1</sub> = 0.0334,<br>wR <sub>2</sub> = 0.0836                | R <sub>1</sub> = 0.0331,<br>wR <sub>2</sub> = 0.0858                | R <sub>1</sub> = 0.0286,<br>wR <sub>2</sub> = 0.0576                |
| Final R indexes [all data]           | R <sub>1</sub> = 0.0294,<br>wR <sub>2</sub> = 0.0689                | R <sub>1</sub> = 0.0383,<br>wR <sub>2</sub> = 0.0858                | R <sub>1</sub> = 0.0348,<br>wR <sub>2</sub> = 0.0866                | R <sub>1</sub> = 0.0396,<br>wR <sub>2</sub> = 0.0609                |

**Table S1 (continued).** Crystal data and structure refinement for all compounds studied.

| Compound                             | 6                                                                   | 7                                                                   | 8                                                                   | 9                                                                   |
|--------------------------------------|---------------------------------------------------------------------|---------------------------------------------------------------------|---------------------------------------------------------------------|---------------------------------------------------------------------|
| Empirical formula                    | C <sub>7</sub> H <sub>10</sub> ClN <sub>5</sub> OSe                 | C <sub>9</sub> H <sub>11</sub> ClN <sub>4</sub> Se                  | C <sub>8</sub> H <sub>10</sub> ClN <sub>3</sub> O <sub>4</sub> Se   | C <sub>32</sub> H <sub>30</sub> BN <sub>3</sub> Se                  |
| Formula weight                       | 294.61                                                              | 289.63                                                              | 326.60                                                              | 546.36                                                              |
| Temperature/K                        | 100.00                                                              | 100.00                                                              | 100.00                                                              | 120.00                                                              |
| Crystal system                       | monoclinic                                                          | monoclinic                                                          | triclinic                                                           | monoclinic                                                          |
| Space group                          | P2 <sub>1</sub> /c                                                  | P2/c                                                                | P-1                                                                 | P2 <sub>1</sub> /c                                                  |
| a/Å                                  | 7.8986(15)                                                          | 11.922(4)                                                           | 6.8384(15)                                                          | 15.3881(6)                                                          |
| b/Å                                  | 14.662(4)                                                           | 6.546(3)                                                            | 9.403(2)                                                            | 9.8662(3)                                                           |
| c/Å                                  | 9.851(4)                                                            | 14.620(5)                                                           | 10.236(2)                                                           | 18.2499(8)                                                          |
| α/°                                  | 90                                                                  | 90                                                                  | 67.561(9)                                                           | 90                                                                  |
| β/°                                  | 111.161(15)                                                         | 108.226(16)                                                         | 74.848(10)                                                          | 105.5660(10)                                                        |
| γ/°                                  | 90                                                                  | 90                                                                  | 70.534(11)                                                          | 90                                                                  |
| Volume/Å <sup>3</sup>                | 1063.9(6)                                                           | 1083.7(7)                                                           | 566.8(2)                                                            | 2669.11(18)                                                         |
| Z                                    | 4                                                                   | 4                                                                   | 2                                                                   | 4                                                                   |
| ρ <sub>calc</sub> /g/cm <sup>3</sup> | 1.839                                                               | 1.775                                                               | 1.914                                                               | 1.360                                                               |
| μ/mm <sup>-1</sup>                   | 3.762                                                               | 3.682                                                               | 3.555                                                               | 1.433                                                               |
| F(000)                               | 584.0                                                               | 576.0                                                               | 324.0                                                               | 1128.0                                                              |
| Crystal size/mm <sup>3</sup>         | 0.6 × 0.4 × 0.4                                                     | 0.6 × 0.2 × 0.1                                                     | 0.5 × 0.4 × 0.2                                                     | 0.6 × 0.4 × 0.15                                                    |
| Radiation                            | MoKα (λ = 0.71073)                                                  |
| 2θ range /°                          | 5.232 - 66.304                                                      | 5.868 - 60.046                                                      | 4.856 - 59.998                                                      | 4.634 - 54.998                                                      |
| Index ranges                         | -11 ≤ h ≤ 12<br>-17 ≤ k ≤ 22<br>-15 ≤ l ≤ 10                        | -16 ≤ h ≤ 15<br>-9 ≤ k ≤ 8<br>-20 ≤ l ≤ 16                          | -9 ≤ h ≤ 8<br>-13 ≤ k ≤ 11<br>-14 ≤ l ≤ 14                          | -18 ≤ h ≤ 19<br>-12 ≤ k ≤ 9<br>-23 ≤ l ≤ 14                         |
| Reflections collected                | 7772                                                                | 6556                                                                | 5966                                                                | 13351                                                               |
| Independent reflections              | 3987<br>[R <sub>int</sub> = 0.0364,<br>R <sub>sigma</sub> = 0.0517] | 3107<br>[R <sub>int</sub> = 0.0363,<br>R <sub>sigma</sub> = 0.0551] | 3260<br>[R <sub>int</sub> = 0.0189,<br>R <sub>sigma</sub> = 0.0298] | 6074<br>[R <sub>int</sub> = 0.0717,<br>R <sub>sigma</sub> = 0.0618] |
| Goodness-of-fit on F <sup>2</sup>    | 1.053                                                               | 1.027                                                               | 1.053                                                               | 1.049                                                               |
| Final R indexes<br>[I ≥ 2σ (I)]      | R <sub>1</sub> = 0.0387,<br>wR <sub>2</sub> = 0.1028                | R <sub>1</sub> = 0.0338,<br>wR <sub>2</sub> = 0.0786                | R <sub>1</sub> = 0.0212,<br>wR <sub>2</sub> = 0.0497                | R <sub>1</sub> = 0.0480,<br>wR <sub>2</sub> = 0.1230                |
| Final R indexes<br>[all data]        | R <sub>1</sub> = 0.0455,<br>wR <sub>2</sub> = 0.1063                | R <sub>1</sub> = 0.0481,<br>wR <sub>2</sub> = 0.0888                | R <sub>1</sub> = 0.0232,<br>wR <sub>2</sub> = 0.0504                | R <sub>1</sub> = 0.0610,<br>wR <sub>2</sub> = 0.1296                |

Gaussian 09 program package citation: [Frisch, M. J.; Trucks, G. W.; Schlegel, H. B.; Scuseria, G. E.; Robb, M. A.; Cheeseman, J. R.; Scalmani, G.; Barone, V.; Mennucci, B.; Petersson, G. A.; Nakatsuji, H.; Caricato, M.; Li, X.; Hratchian, H. P.; Izmaylov, A. F.; Bloino, J.; Zheng, G.; Sonnenberg, J. L.; Hada, M.; Ehara, M.; Toyota, K.; Fukuda, R.; Hasegawa, J.; Ishida, M.; Nakajima, T.; Honda, Y.; Kitao, O.; Nakai, H.; Vreven, T.; Montgomery, J. A., Jr.; Peralta, J. E.; Ogliaro, F.; Bearpark, M.; Heyd, J. J.; Brothers, E.; Kudin, K. N.; Staroverov, V. N.; Keith, R.; Kobayashi, J.; Normand, K.; Raghavachari, A.; Rendell, J. C.; Burant, S. S.; Iyengar, T.; Tomasi, J.; Cossi, M.; Rega, N.; Millam, J. M.; Klene, M.; Knox, J. E.; Cross, J. B.; Bakken, V.; Adamo, C.; Jaramillo, J.; Gomperts, R.; Stratmann, R. E.; Yazyev, O.; Austin, A. J.; Cammi, R.; Pomelli, C.; Ochterski, J. W.; Martin, R. L.; Morokuma, K.; Zakrzewski, V. G.; Voth, G. A.; Salvador, P.; Dannenberg, J. J.; Dapprich, S.; Daniels, A. D.; Farkas, O.; Foresman, J. B.; Ortiz, J. V.; Cioslowski, J.; Fox, D. J. Gaussian 09, Rev. D.01; Gaussian, Inc.: 2013.]

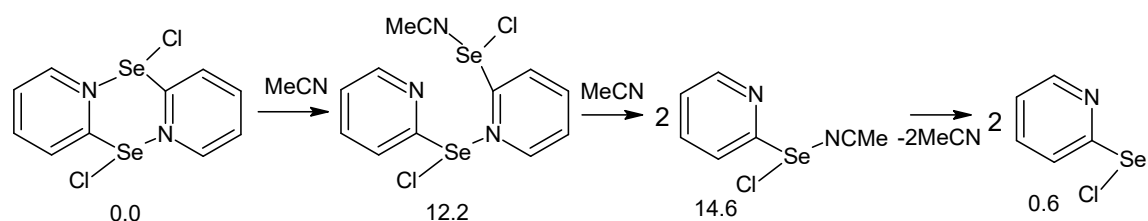

**Figure S1.** Alternative way of the  $(\text{PySeCl})_2$  dimer decomposition (relative Gibbs free energies are indicated in kcal/mol).

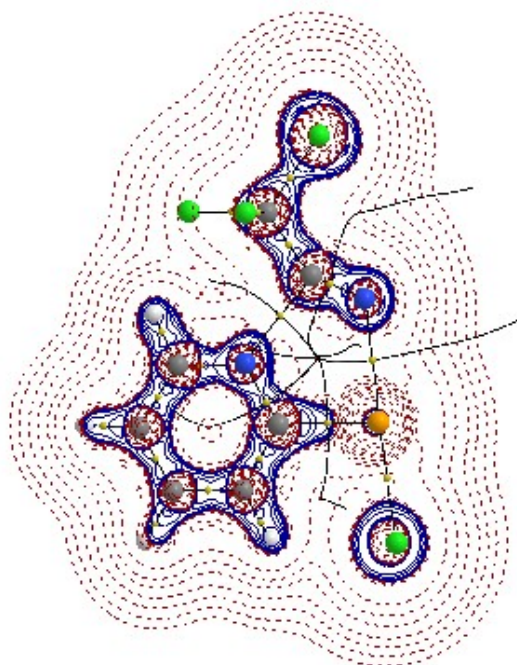

**Figure S2.** Contour line diagram of the Laplacian distribution,  $\nabla^2\rho(r)$ , selected zero flux surfaces and bond paths for the  $\text{N}\equiv\text{C}\cdots\text{N}$  plane in  $\text{TSCl}_3/\text{Cl}$ .

**Table S2.** Atomic Cartesian coordinates (in Å) of the calculated structures (nuclear charge is indicated in the first column).

PySeCl (in DCM)

|    |           |           |           |
|----|-----------|-----------|-----------|
| 34 | 3.097313  | 0.975548  | 0.210124  |
| 7  | 0.463938  | 1.338395  | -0.047449 |
| 6  | 1.303856  | 0.314549  | -0.004693 |
| 6  | 0.931708  | -1.020576 | -0.101265 |
| 1  | 1.658592  | -1.820033 | -0.060516 |
| 6  | -0.424771 | -1.282907 | -0.253448 |
| 1  | -0.769358 | -2.307533 | -0.333681 |
| 6  | -1.328066 | -0.226380 | -0.301364 |
| 1  | -2.390193 | -0.397920 | -0.419056 |
| 6  | -0.835922 | 1.068390  | -0.194099 |
| 1  | -1.501635 | 1.924298  | -0.226060 |
| 17 | 4.197754  | -0.922243 | 0.242131  |

PySeCl (in MeCN)

|    |           |           |           |
|----|-----------|-----------|-----------|
| 34 | -1.216321 | -0.758853 | -0.155281 |
| 7  | 1.425235  | -1.138811 | -0.248496 |
| 6  | 0.596577  | -0.121275 | -0.061257 |
| 6  | 0.991284  | 1.192417  | 0.158616  |
| 1  | 0.273635  | 1.988170  | 0.304526  |
| 6  | 2.359244  | 1.439306  | 0.180877  |
| 1  | 2.721977  | 2.447338  | 0.346777  |
| 6  | 3.250810  | 0.389541  | -0.012604 |
| 1  | 4.321175  | 0.549776  | -0.001951 |
| 6  | 2.736434  | -0.883553 | -0.224455 |
| 1  | 3.393292  | -1.732565 | -0.381360 |
| 17 | -2.296927 | 1.111484  | 0.235127  |

(PySeCl)<sub>2</sub>

|    |          |          |           |
|----|----------|----------|-----------|
| 34 | 3.792184 | 4.718237 | 9.126856  |
| 17 | 3.872308 | 4.742593 | 11.474606 |
| 7  | 5.708311 | 2.928912 | 8.146132  |
| 6  | 5.550222 | 3.927097 | 9.015409  |
| 6  | 6.610791 | 4.396529 | 9.786082  |
| 1  | 6.455186 | 5.213393 | 10.477136 |
| 6  | 7.850103 | 3.791397 | 9.646540  |
| 1  | 8.689909 | 4.138832 | 10.235974 |
| 6  | 8.007320 | 2.748610 | 8.737764  |
| 1  | 8.958854 | 2.253988 | 8.598400  |
| 6  | 6.908195 | 2.350537 | 7.999969  |
| 1  | 6.960401 | 1.547240 | 7.274067  |
| 34 | 4.020393 | 1.896377 | 7.036653  |
| 17 | 2.293765 | 0.946179 | 5.758077  |
| 7  | 3.885463 | 4.686661 | 6.860524  |

|   |          |          |          |
|---|----------|----------|----------|
| 6 | 3.857411 | 3.583879 | 6.112120 |
| 6 | 3.745043 | 3.647346 | 4.725601 |
| 1 | 3.733297 | 2.736456 | 4.143210 |
| 6 | 3.645053 | 4.892764 | 4.125186 |
| 1 | 3.555922 | 4.967210 | 3.048185 |
| 6 | 3.673661 | 6.039956 | 4.913293 |
| 1 | 3.601577 | 7.028812 | 4.481485 |
| 6 | 3.801785 | 5.892321 | 6.281752 |
| 1 | 3.832733 | 6.742332 | 6.953665 |

(PySeCl)<sub>2</sub>NCMe

|    |           |           |           |
|----|-----------|-----------|-----------|
| 34 | -1.079295 | 1.541413  | -2.614719 |
| 17 | -1.552601 | 0.085321  | -4.223179 |
| 7  | 0.300806  | -0.260730 | -0.935623 |
| 6  | -0.914061 | 0.203742  | -1.228294 |
| 6  | -2.068295 | -0.229273 | -0.586644 |
| 1  | -3.027344 | 0.189616  | -0.859964 |
| 6  | -1.952016 | -1.201916 | 0.399061  |
| 1  | -2.830742 | -1.561065 | 0.920685  |
| 6  | -0.692459 | -1.697594 | 0.700730  |
| 1  | -0.549201 | -2.458143 | 1.456855  |
| 6  | 0.405462  | -1.196801 | 0.010809  |
| 1  | 1.403072  | -1.563562 | 0.223548  |
| 34 | 2.287624  | 0.692995  | -2.147062 |
| 17 | 4.197819  | 1.532392  | -3.104591 |
| 7  | 3.290189  | 0.423582  | 0.447306  |
| 6  | 3.289302  | -0.177807 | -0.737309 |
| 6  | 3.935161  | -1.383693 | -0.998231 |
| 1  | 3.891936  | -1.824105 | -1.985704 |
| 6  | 4.623996  | -1.992690 | 0.044175  |
| 1  | 5.141802  | -2.930859 | -0.115980 |
| 6  | 4.627284  | -1.380840 | 1.291544  |
| 1  | 5.144442  | -1.821576 | 2.134020  |
| 6  | 3.948058  | -0.176305 | 1.443065  |
| 1  | 3.931076  | 0.332056  | 2.401400  |
| 7  | -0.165348 | 3.087045  | -0.393846 |
| 6  | 0.951251  | 3.348213  | -0.302458 |
| 6  | 2.363335  | 3.680218  | -0.186451 |
| 1  | 2.757986  | 3.912518  | -1.176192 |
| 1  | 2.889878  | 2.811697  | 0.214054  |
| 1  | 2.484963  | 4.541458  | 0.470316  |

PySe(Cl)(NCMe)

|    |           |           |           |
|----|-----------|-----------|-----------|
| 34 | -1.559746 | 1.635170  | -2.775384 |
| 17 | -2.966718 | 0.392783  | -3.963741 |
| 7  | -0.527510 | -0.873972 | -2.086036 |
| 6  | -1.053949 | 0.218851  | -1.553410 |
| 6  | -1.251139 | 0.409531  | -0.188657 |
| 1  | -1.700149 | 1.322098  | 0.179625  |
| 6  | -0.856284 | -0.609858 | 0.669265  |

|   |           |           |           |
|---|-----------|-----------|-----------|
| 1 | -0.986766 | -0.504664 | 1.739677  |
| 6 | -0.312670 | -1.768349 | 0.129165  |
| 1 | -0.001912 | -2.592021 | 0.758798  |
| 6 | -0.176508 | -1.855572 | -1.252631 |
| 1 | 0.240093  | -2.745789 | -1.711999 |
| 7 | 0.295312  | 3.066016  | -1.229273 |
| 6 | 1.108671  | 3.730175  | -0.764728 |
| 6 | 2.141674  | 4.571244  | -0.176550 |
| 1 | 2.055797  | 5.582330  | -0.572859 |
| 1 | 3.122483  | 4.166488  | -0.423444 |
| 1 | 2.020903  | 4.594079  | 0.905789  |

PySeBr

|    |           |           |           |
|----|-----------|-----------|-----------|
| 34 | 0.647000  | -1.089831 | -0.012541 |
| 7  | -2.014121 | -1.062479 | -0.243042 |
| 6  | -1.053396 | -0.178796 | -0.012505 |
| 6  | -1.263569 | 1.175578  | 0.214000  |
| 1  | -0.447973 | 1.858579  | 0.407352  |
| 6  | -2.580662 | 1.619911  | 0.186073  |
| 1  | -2.798535 | 2.668331  | 0.354902  |
| 6  | -3.606775 | 0.712968  | -0.054701 |
| 1  | -4.642309 | 1.027087  | -0.082953 |
| 6  | -3.274534 | -0.620296 | -0.259810 |
| 1  | -4.040952 | -1.364284 | -0.450030 |
| 35 | 2.127905  | 0.706874  | 0.133328  |

PBr/Cl

|    |           |           |           |
|----|-----------|-----------|-----------|
| 34 | 2.847796  | -0.512212 | -0.330072 |
| 7  | 2.190108  | 1.242562  | -0.344070 |
| 7  | 0.252339  | 0.055168  | 0.054521  |
| 6  | 0.954011  | 1.278797  | -0.144777 |
| 6  | 1.075200  | -1.034277 | -0.004451 |
| 6  | 0.535628  | -2.310600 | 0.172003  |
| 1  | 1.200591  | -3.161382 | 0.122277  |
| 6  | -0.814271 | -2.437999 | 0.401280  |
| 1  | -1.244171 | -3.422560 | 0.539626  |
| 6  | -1.639197 | -1.300336 | 0.457265  |
| 1  | -2.702335 | -1.381274 | 0.636489  |
| 6  | -1.092299 | -0.066161 | 0.282527  |
| 1  | -1.665928 | 0.847387  | 0.312978  |
| 35 | -0.027496 | 2.894002  | -0.096167 |
| 17 | 3.654914  | -3.173526 | -0.277881 |

PCCl<sub>3</sub>/Cl

|    |          |           |           |
|----|----------|-----------|-----------|
| 34 | 2.817640 | -0.491224 | -0.326483 |
| 7  | 2.159945 | 1.232666  | -0.338218 |
| 7  | 0.219835 | 0.060502  | 0.059569  |
| 6  | 0.914806 | 1.293345  | -0.139101 |
| 6  | 1.051811 | -1.024597 | -0.001294 |
| 6  | 0.538683 | -2.310868 | 0.171378  |

|    |           |           |           |
|----|-----------|-----------|-----------|
| 1  | 1.223074  | -3.146159 | 0.117352  |
| 6  | -0.806897 | -2.467001 | 0.401876  |
| 1  | -1.218812 | -3.459538 | 0.537723  |
| 6  | -1.647767 | -1.342631 | 0.461476  |
| 1  | -2.709408 | -1.440107 | 0.641558  |
| 6  | -1.125320 | -0.097278 | 0.290111  |
| 1  | -1.736171 | 0.788280  | 0.328656  |
| 6  | 0.170672  | 2.624471  | -0.109582 |
| 17 | 1.301791  | 3.951964  | -0.386029 |
| 17 | -0.601245 | 2.857403  | 1.487300  |
| 17 | -1.072055 | 2.658146  | -1.395911 |
| 17 | 3.669855  | -3.197302 | -0.278590 |

PMe<sub>2</sub>N/Cl

|    |           |           |           |
|----|-----------|-----------|-----------|
| 34 | 3.049139  | -0.084762 | -0.038473 |
| 7  | 2.187539  | 1.548681  | -0.023771 |
| 7  | 0.399209  | 0.098990  | 0.103122  |
| 6  | 0.921780  | 1.437894  | 0.061116  |
| 6  | 1.356206  | -0.867464 | 0.107123  |
| 6  | 0.982967  | -2.212915 | 0.168311  |
| 1  | 1.762670  | -2.962797 | 0.184280  |
| 6  | -0.356423 | -2.524720 | 0.188621  |
| 1  | -0.664793 | -3.562179 | 0.236575  |
| 6  | -1.328464 | -1.508626 | 0.119000  |
| 1  | -2.384263 | -1.741142 | 0.092187  |
| 6  | -0.934095 | -0.205185 | 0.070727  |
| 1  | -1.610511 | 0.632329  | -0.015992 |
| 7  | 0.002743  | 2.468757  | 0.081949  |
| 17 | 4.262302  | -2.808271 | 0.003758  |
| 6  | 0.525421  | 3.731003  | -0.442962 |
| 6  | -0.671197 | 2.672007  | 1.376862  |
| 1  | -0.311465 | 4.423793  | -0.535897 |
| 1  | 0.967724  | 3.571238  | -1.425234 |
| 1  | 1.278654  | 4.165593  | 0.224119  |
| 1  | -1.552069 | 3.293542  | 1.214569  |
| 1  | 0.002189  | 3.175285  | 2.080920  |
| 1  | -0.985654 | 1.725838  | 1.816219  |

PMe/Br

|    |           |           |           |
|----|-----------|-----------|-----------|
| 34 | 3.042879  | 0.917555  | -0.526794 |
| 7  | 2.385543  | 2.648388  | -0.538875 |
| 7  | 0.467454  | 1.452933  | -0.143228 |
| 6  | 1.131230  | 2.706612  | -0.338308 |
| 6  | 1.286306  | 0.366576  | -0.201809 |
| 6  | 0.756284  | -0.912946 | -0.026808 |
| 1  | 1.426976  | -1.760599 | -0.077810 |
| 6  | -0.594545 | -1.042174 | 0.202777  |
| 1  | -1.023505 | -2.027298 | 0.340928  |
| 6  | -1.421576 | 0.094245  | 0.259267  |
| 1  | -2.484398 | 0.008266  | 0.438796  |



|    |           |           |           |
|----|-----------|-----------|-----------|
| 6  | -0.875152 | 1.331164  | 0.084472  |
| 1  | -1.445898 | 2.248006  | 0.114265  |
| 6  | 0.327979  | 3.960010  | -0.293735 |
| 1  | 0.998855  | 4.799550  | -0.461193 |
| 1  | -0.156881 | 4.074054  | 0.678590  |
| 1  | -0.442049 | 3.953411  | -1.068669 |
| 35 | 4.016908  | -2.046044 | -0.481093 |

PMe/Cl

|    |           |          |          |
|----|-----------|----------|----------|
| 34 | 0.645887  | 4.144715 | 5.170787 |
| 7  | -0.163348 | 5.711670 | 5.701005 |
| 7  | 1.808803  | 6.503856 | 4.833518 |
| 6  | 0.544026  | 6.741716 | 5.458611 |
| 6  | 2.076815  | 5.192203 | 4.584846 |
| 6  | 3.279453  | 4.828819 | 3.977793 |
| 1  | 3.468764  | 3.780235 | 3.790884 |
| 6  | 4.173108  | 5.820849 | 3.642990 |
| 1  | 5.112479  | 5.559494 | 3.170894 |
| 6  | 3.876045  | 7.170160 | 3.908991 |
| 1  | 4.569098  | 7.959314 | 3.651168 |
| 6  | 2.692461  | 7.493293 | 4.503241 |
| 1  | 2.394648  | 8.504603 | 4.738453 |
| 6  | 0.149002  | 8.141936 | 5.776009 |
| 1  | -0.833349 | 8.120382 | 6.242471 |
| 1  | 0.103549  | 8.745795 | 4.866733 |
| 1  | 0.864900  | 8.598651 | 6.463322 |
| 17 | 2.149965  | 1.644952 | 4.222888 |

PPh/Cl

|    |           |           |           |
|----|-----------|-----------|-----------|
| 34 | -1.093194 | -0.438010 | 0.857592  |
| 7  | -1.802454 | 1.264096  | 0.809817  |
| 7  | -3.664866 | 0.003812  | 0.328803  |
| 6  | -3.043113 | 1.279755  | 0.528614  |
| 6  | -2.808671 | -1.050947 | 0.441172  |
| 6  | -3.282645 | -2.354252 | 0.269669  |
| 1  | -2.580339 | -3.172472 | 0.355555  |
| 6  | -4.619473 | -2.542240 | 0.009412  |
| 1  | -5.003111 | -3.546291 | -0.125602 |
| 6  | -5.492736 | -1.441292 | -0.067359 |
| 1  | -6.550349 | -1.573286 | -0.250121 |
| 6  | -5.001748 | -0.181120 | 0.095836  |
| 1  | -5.611886 | 0.709305  | 0.063072  |
| 17 | -0.123611 | -3.230478 | 0.850986  |
| 6  | -5.188803 | 4.945588  | 0.191545  |
| 6  | -4.500647 | 4.637579  | 1.361624  |
| 6  | -5.190995 | 4.049585  | -0.874676 |
| 6  | -3.817297 | 3.431792  | 1.471652  |
| 6  | -4.514378 | 2.840342  | -0.769945 |
| 6  | -3.831793 | 2.528616  | 0.408362  |
| 1  | -5.719059 | 5.887118  | 0.107127  |

|   |           |          |           |
|---|-----------|----------|-----------|
| 1 | -4.494007 | 5.336410 | 2.189685  |
| 1 | -3.273231 | 3.185108 | 2.376222  |
| 1 | -4.499428 | 2.152406 | -1.608777 |
| 1 | -5.711746 | 4.295115 | -1.792674 |

PPhNH/Cl

|    |           |           |           |
|----|-----------|-----------|-----------|
| 34 | 1.429111  | -1.265291 | -0.258502 |
| 7  | -0.367839 | -0.847727 | -0.284816 |
| 7  | 0.569876  | 1.240360  | 0.009365  |
| 6  | -0.583673 | 0.397623  | -0.143629 |
| 6  | 1.750859  | 0.564310  | -0.060216 |
| 6  | 2.956521  | 1.264124  | 0.036081  |
| 1  | 3.880800  | 0.705980  | -0.030453 |
| 6  | 2.918691  | 2.626236  | 0.219440  |
| 1  | 3.844848  | 3.183467  | 0.292438  |
| 6  | 1.686501  | 3.297506  | 0.328006  |
| 1  | 1.639335  | 4.363857  | 0.500461  |
| 6  | 0.526212  | 2.590794  | 0.226929  |
| 1  | -0.449885 | 3.040405  | 0.331272  |
| 7  | -1.803545 | 1.019885  | -0.072519 |
| 17 | 4.360551  | -1.750131 | -0.169470 |
| 1  | -1.876563 | 1.907999  | -0.556287 |
| 6  | -3.163744 | -0.851784 | 0.759358  |
| 6  | -4.405985 | -1.469780 | 0.846530  |
| 6  | -3.028183 | 0.311285  | 0.000149  |
| 6  | -5.516305 | -0.938763 | 0.195391  |
| 6  | -4.136570 | 0.848530  | -0.655315 |
| 6  | -5.375111 | 0.225902  | -0.552547 |
| 1  | -2.310308 | -1.269605 | 1.276275  |
| 1  | -4.502975 | -2.374480 | 1.435799  |
| 1  | -6.480191 | -1.427766 | 0.271364  |
| 1  | -6.228945 | 0.653754  | -1.065240 |
| 1  | -4.024717 | 1.753938  | -1.242999 |

TSBr/Cl

|    |           |           |           |
|----|-----------|-----------|-----------|
| 34 | 2.898006  | -0.526617 | 0.034541  |
| 7  | 2.034744  | 1.688678  | -0.479059 |
| 7  | 0.104487  | -0.090777 | 0.127473  |
| 6  | 0.927242  | 1.817220  | -0.131750 |
| 6  | 1.012536  | -1.052418 | 0.004615  |
| 6  | 0.632691  | -2.387295 | -0.141057 |
| 1  | 1.369960  | -3.165844 | -0.264058 |
| 6  | -0.719061 | -2.696619 | -0.134831 |
| 1  | -1.030835 | -3.727588 | -0.255122 |
| 6  | -1.660449 | -1.685361 | 0.017593  |
| 1  | -2.722979 | -1.888503 | 0.030695  |
| 6  | -1.197238 | -0.387538 | 0.136046  |
| 1  | -1.882694 | 0.446174  | 0.239237  |
| 35 | -0.470860 | 2.903619  | 0.322001  |
| 17 | 3.668331  | -2.574910 | 0.629027  |

TSCCl<sub>3</sub>/Cl

|    |           |           |           |
|----|-----------|-----------|-----------|
| 34 | 2.881434  | -0.533268 | -0.266579 |
| 7  | 2.101378  | 1.657028  | -0.413937 |
| 7  | 0.048815  | -0.097548 | -0.241493 |
| 6  | 0.951445  | 1.822998  | -0.335202 |
| 6  | 0.982032  | -1.047735 | -0.308398 |
| 6  | 0.629116  | -2.396961 | -0.403627 |
| 1  | 1.381517  | -3.164832 | -0.475729 |
| 6  | -0.710122 | -2.745485 | -0.408832 |
| 1  | -0.989613 | -3.789718 | -0.489072 |
| 6  | -1.677395 | -1.753292 | -0.313989 |
| 1  | -2.735627 | -1.977790 | -0.307443 |
| 6  | -1.247567 | -0.443546 | -0.236258 |
| 1  | -1.967158 | 0.361740  | -0.169873 |
| 6  | -0.201386 | 2.758859  | -0.279689 |
| 17 | 0.463811  | 4.406791  | -0.339898 |
| 17 | -1.095295 | 2.538700  | 1.237021  |
| 17 | -1.256547 | 2.505785  | -1.685486 |
| 17 | 3.715012  | -2.657586 | -0.081186 |

TSM<sub>2</sub>N/Cl

|    |           |           |           |
|----|-----------|-----------|-----------|
| 34 | 2.883508  | -0.006791 | 0.025596  |
| 7  | 2.326281  | 1.847490  | 0.232472  |
| 7  | 0.165281  | 0.507027  | -0.186754 |
| 6  | 1.220805  | 2.297265  | 0.167704  |
| 6  | 1.011992  | -0.506108 | -0.236183 |
| 6  | 0.577934  | -1.816496 | -0.454127 |
| 1  | 1.283354  | -2.632670 | -0.492355 |
| 6  | -0.782080 | -2.026729 | -0.616880 |
| 1  | -1.148546 | -3.032766 | -0.786469 |
| 6  | -1.670841 | -0.954045 | -0.561693 |
| 1  | -2.737087 | -1.091585 | -0.684462 |
| 6  | -1.148540 | 0.306696  | -0.342811 |
| 1  | -1.777773 | 1.188252  | -0.286801 |
| 7  | 0.333653  | 3.250153  | 0.185509  |
| 17 | 3.725303  | -2.497673 | -0.249606 |
| 6  | -0.186624 | 3.764407  | -1.085929 |
| 6  | -0.508401 | 3.434166  | 1.372675  |
| 1  | -0.025035 | 2.984598  | 2.237827  |
| 1  | -1.488231 | 2.977075  | 1.216638  |
| 1  | -0.628034 | 4.505080  | 1.539901  |
| 1  | -1.064857 | 3.194569  | -1.399950 |
| 1  | 0.586049  | 3.703300  | -1.849816 |
| 1  | -0.462542 | 4.808054  | -0.934047 |

TSM<sub>2</sub>Br

|    |           |           |           |
|----|-----------|-----------|-----------|
| 34 | 2.806578  | -0.386909 | -0.023811 |
| 7  | 1.990323  | 1.631769  | -0.173629 |
| 7  | -0.000869 | -0.059659 | 0.003197  |

|    |           |           |           |
|----|-----------|-----------|-----------|
| 6  | 0.838537  | 1.841695  | -0.093770 |
| 6  | 0.932938  | -0.997755 | -0.057132 |
| 6  | 0.584823  | -2.347974 | -0.143344 |
| 1  | 1.338340  | -3.116746 | -0.206365 |
| 6  | -0.760142 | -2.685808 | -0.150315 |
| 1  | -1.044990 | -3.729258 | -0.221487 |
| 6  | -1.730190 | -1.691944 | -0.070018 |
| 1  | -2.787584 | -1.921813 | -0.069681 |
| 6  | -1.298417 | -0.380286 | 0.000901  |
| 1  | -1.997143 | 0.447945  | 0.054538  |
| 6  | -0.363293 | 2.667820  | -0.024016 |
| 1  | -0.055398 | 3.713936  | -0.049057 |
| 1  | -0.898550 | 2.462499  | 0.903857  |
| 1  | -1.010962 | 2.454423  | -0.874996 |
| 35 | 3.822139  | -2.694493 | 0.213530  |

TSMe/Cl

|    |           |           |           |
|----|-----------|-----------|-----------|
| 34 | 3.196653  | 1.010717  | 0.148318  |
| 7  | 2.453994  | 3.008152  | -0.027723 |
| 7  | 0.400686  | 1.370699  | -0.072624 |
| 6  | 1.318739  | 3.292049  | -0.060920 |
| 6  | 1.321491  | 0.421175  | -0.039462 |
| 6  | 0.969620  | -0.927511 | -0.136896 |
| 1  | 1.715756  | -1.705706 | -0.122947 |
| 6  | -0.374653 | -1.247998 | -0.257439 |
| 1  | -0.666467 | -2.288996 | -0.336669 |
| 6  | -1.335097 | -0.241788 | -0.279158 |
| 1  | -2.391092 | -0.460645 | -0.369847 |
| 6  | -0.895049 | 1.066071  | -0.187291 |
| 1  | -1.584408 | 1.904026  | -0.206637 |
| 6  | 0.132560  | 4.136615  | -0.096676 |
| 1  | 0.457819  | 5.178111  | -0.082406 |
| 1  | -0.488022 | 3.930735  | 0.776302  |
| 1  | -0.434639 | 3.938549  | -1.006705 |
| 17 | 4.057750  | -1.230366 | 0.397563  |

TSPH/Cl

|    |           |           |           |
|----|-----------|-----------|-----------|
| 34 | -0.708274 | 0.148431  | 1.159091  |
| 7  | -1.403266 | 2.177038  | 0.861853  |
| 7  | -3.383453 | 0.544580  | 0.343034  |
| 6  | -2.496420 | 2.433377  | 0.519901  |
| 6  | -2.525765 | -0.415941 | 0.646962  |
| 6  | -2.914342 | -1.758646 | 0.600743  |
| 1  | -2.225411 | -2.550170 | 0.847732  |
| 6  | -4.216851 | -2.053733 | 0.227931  |
| 1  | -4.534341 | -3.089476 | 0.188596  |
| 6  | -5.105632 | -1.031325 | -0.092123 |
| 1  | -6.126825 | -1.232179 | -0.387855 |
| 6  | -4.637810 | 0.267638  | -0.019490 |
| 1  | -5.266514 | 1.122467  | -0.252658 |

|    |           |           |           |
|----|-----------|-----------|-----------|
| 17 | 0.076990  | -2.085316 | 1.492055  |
| 6  | -5.740010 | 4.869187  | -0.607077 |
| 6  | -5.615383 | 4.454795  | 0.717361  |
| 6  | -4.799795 | 4.483116  | -1.559646 |
| 6  | -4.548657 | 3.650860  | 1.097876  |
| 6  | -3.727142 | 3.680017  | -1.193093 |
| 6  | -3.606098 | 3.275624  | 0.137814  |
| 1  | -6.574982 | 5.496358  | -0.898079 |
| 1  | -6.349303 | 4.758496  | 1.454208  |
| 1  | -4.440330 | 3.314303  | 2.122371  |
| 1  | -2.988543 | 3.367032  | -1.921692 |
| 1  | -4.901340 | 4.807079  | -2.588482 |

TSP<sub>h</sub>NH/Cl

|    |           |           |           |
|----|-----------|-----------|-----------|
| 34 | 1.807743  | -2.097901 | 0.435785  |
| 7  | 1.913189  | -0.285409 | 1.445843  |
| 7  | -0.598201 | -0.922593 | 1.250724  |
| 6  | 0.992163  | 0.343768  | 1.839493  |
| 6  | -0.143641 | -2.001382 | 0.638078  |
| 6  | -1.014693 | -2.997811 | 0.187483  |
| 1  | -0.645582 | -3.879114 | -0.312598 |
| 6  | -2.372465 | -2.823347 | 0.407570  |
| 1  | -3.066406 | -3.583671 | 0.067402  |
| 6  | -2.839032 | -1.686235 | 1.063101  |
| 1  | -3.892817 | -1.529245 | 1.252133  |
| 6  | -1.904596 | -0.752982 | 1.471679  |
| 1  | -2.187881 | 0.159847  | 1.987611  |
| 7  | 0.362068  | 1.374934  | 2.367171  |
| 17 | 1.728856  | -4.217032 | -0.823858 |
| 1  | 0.223867  | 1.375616  | 3.373830  |
| 6  | -0.422999 | 2.167482  | 0.192083  |
| 6  | -1.184627 | 3.069244  | -0.544073 |
| 6  | -0.404628 | 2.273321  | 1.580923  |
| 6  | -1.920962 | 4.062827  | 0.093314  |
| 6  | -1.138116 | 3.262064  | 2.233340  |
| 6  | -1.893079 | 4.154838  | 1.483007  |
| 1  | 0.143850  | 1.391718  | -0.311332 |
| 1  | -1.199748 | 2.988082  | -1.624670 |
| 1  | -2.513378 | 4.759665  | -0.487276 |
| 1  | -2.462483 | 4.925391  | 1.989762  |
| 1  | -1.111113 | 3.327503  | 3.315927  |

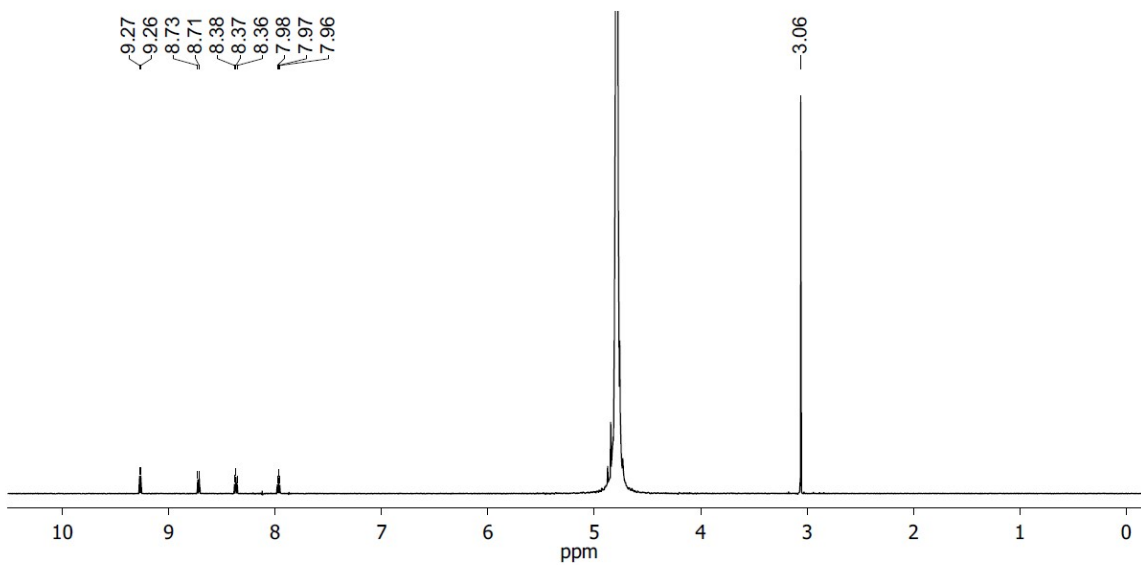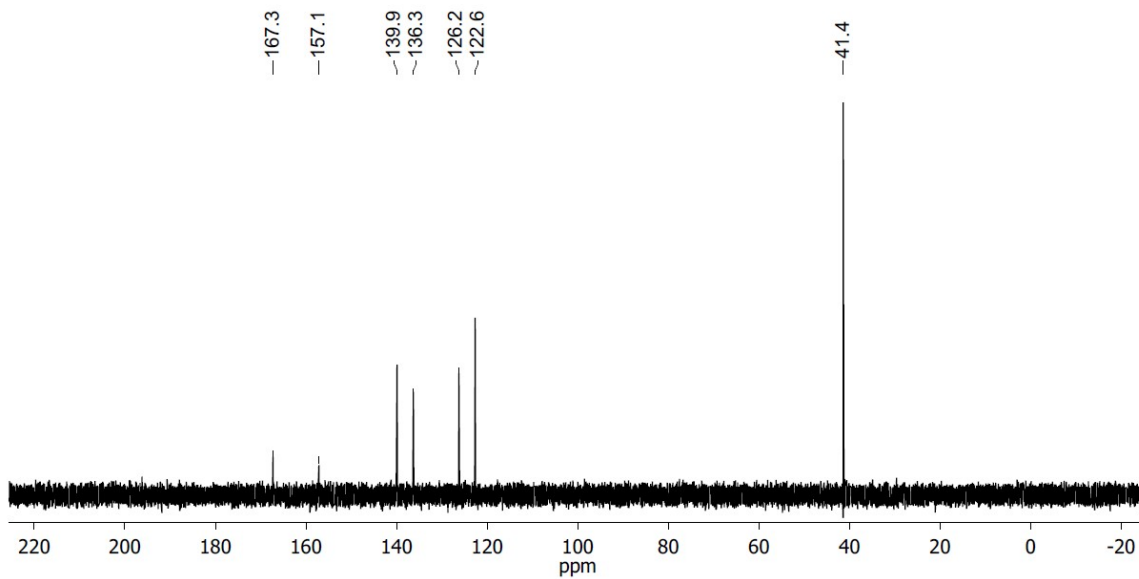

$^1\text{H}$  and  $^{13}\text{C}\{^1\text{H}\}$  NMR spectra of **1** ( $\text{D}_2\text{O}$ ).

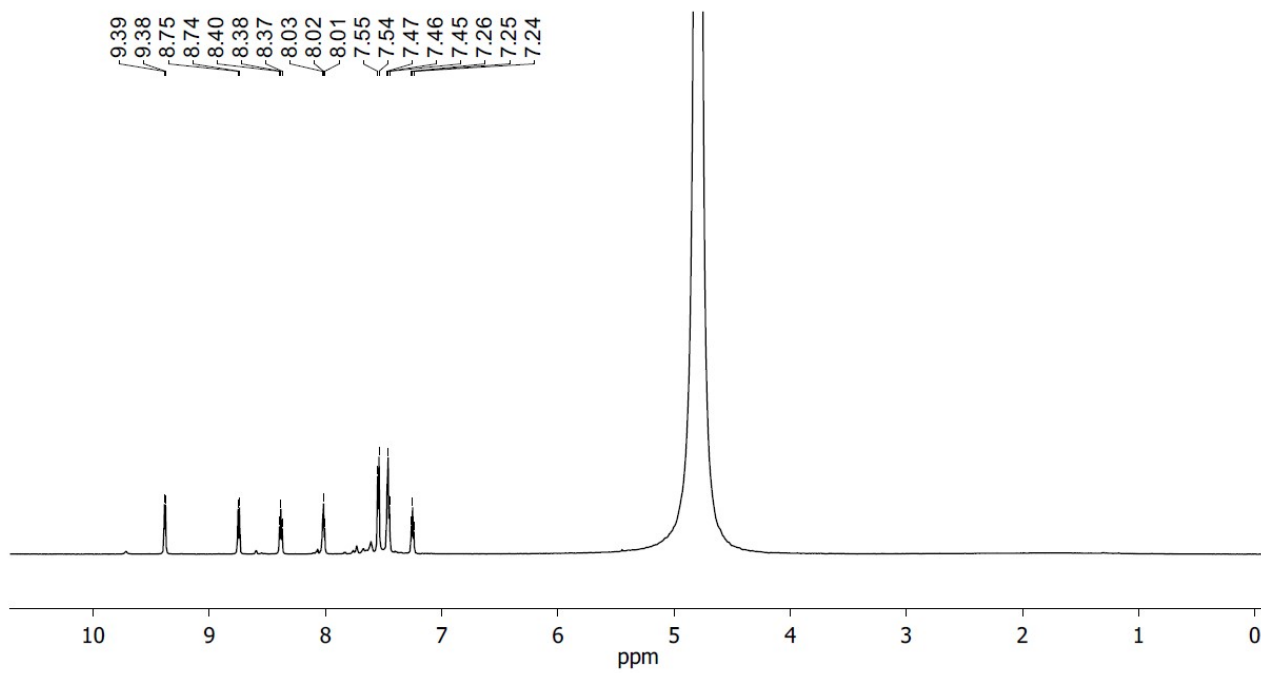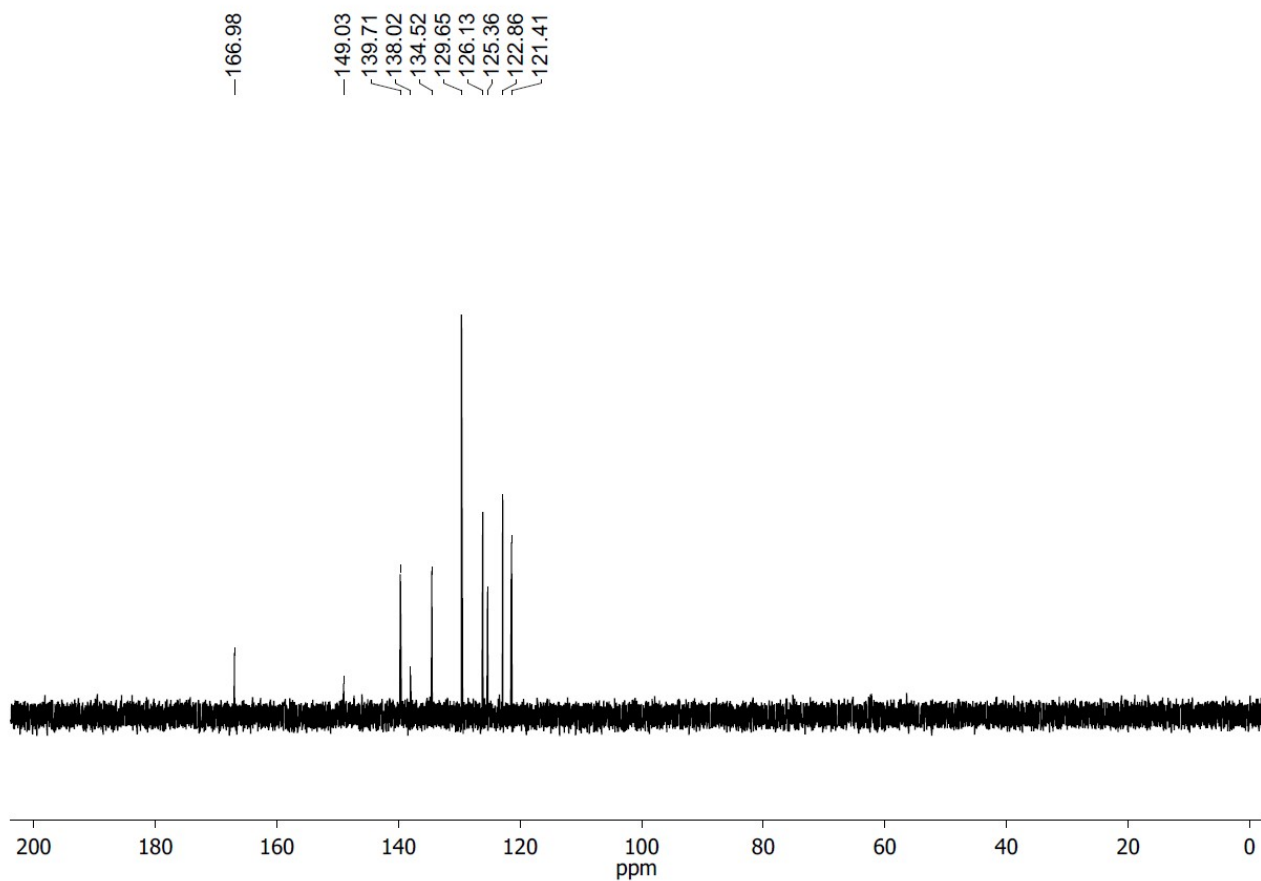

$^1\text{H}$  and  $^{13}\text{C}\{^1\text{H}\}$  NMR spectra of **2** ( $\text{D}_2\text{O}$ ).

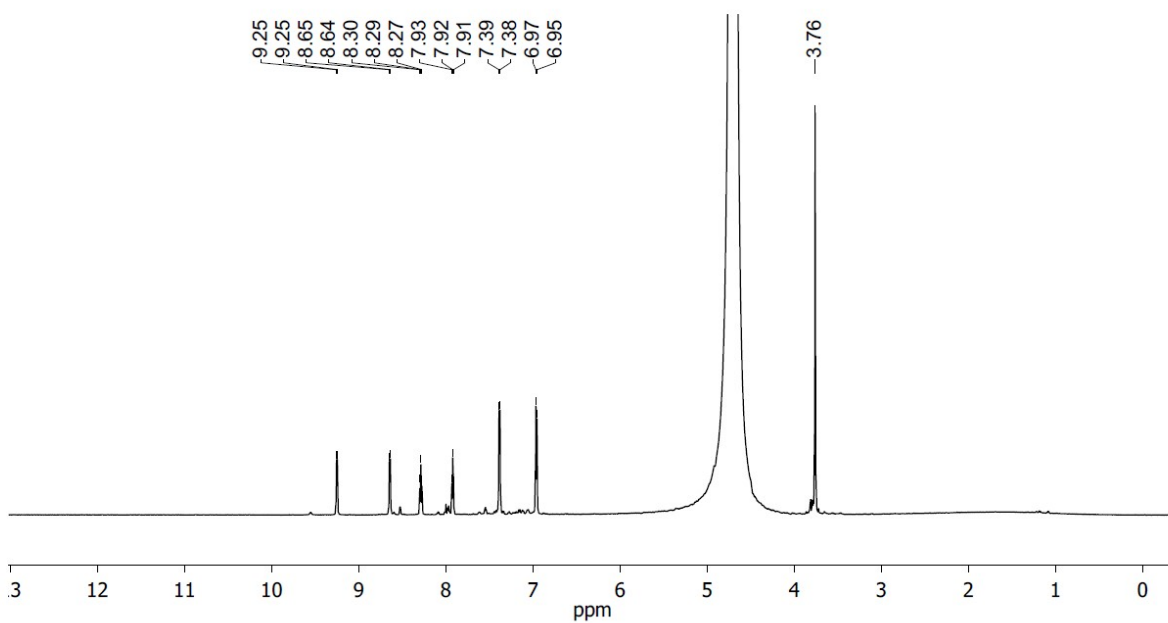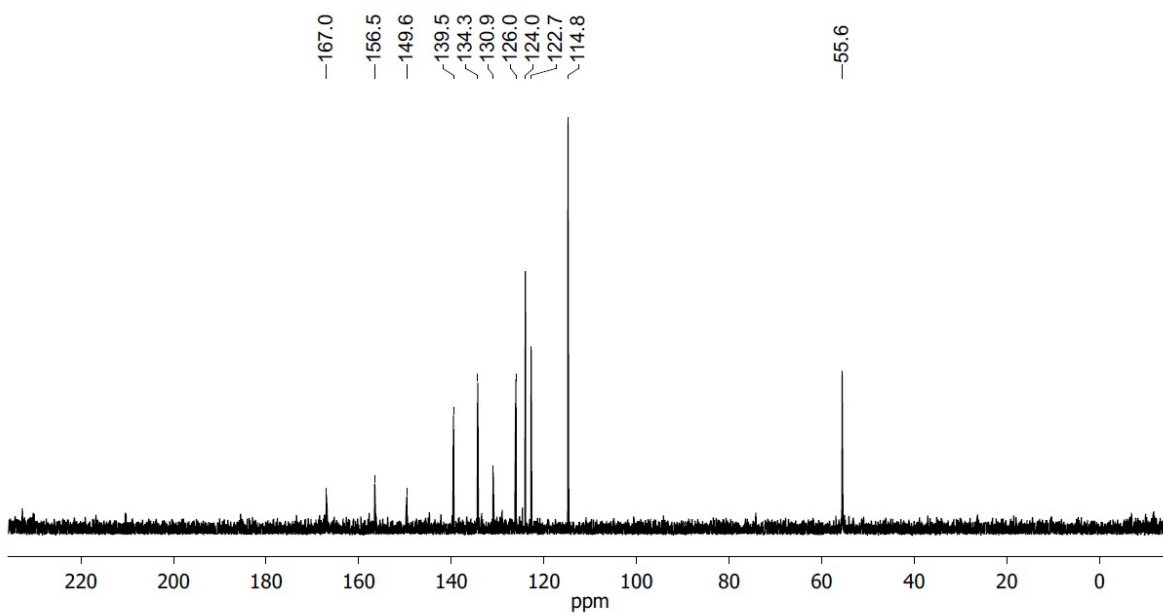

<sup>1</sup>H and <sup>13</sup>C{<sup>1</sup>H} NMR spectra of **3** (D<sub>2</sub>O).



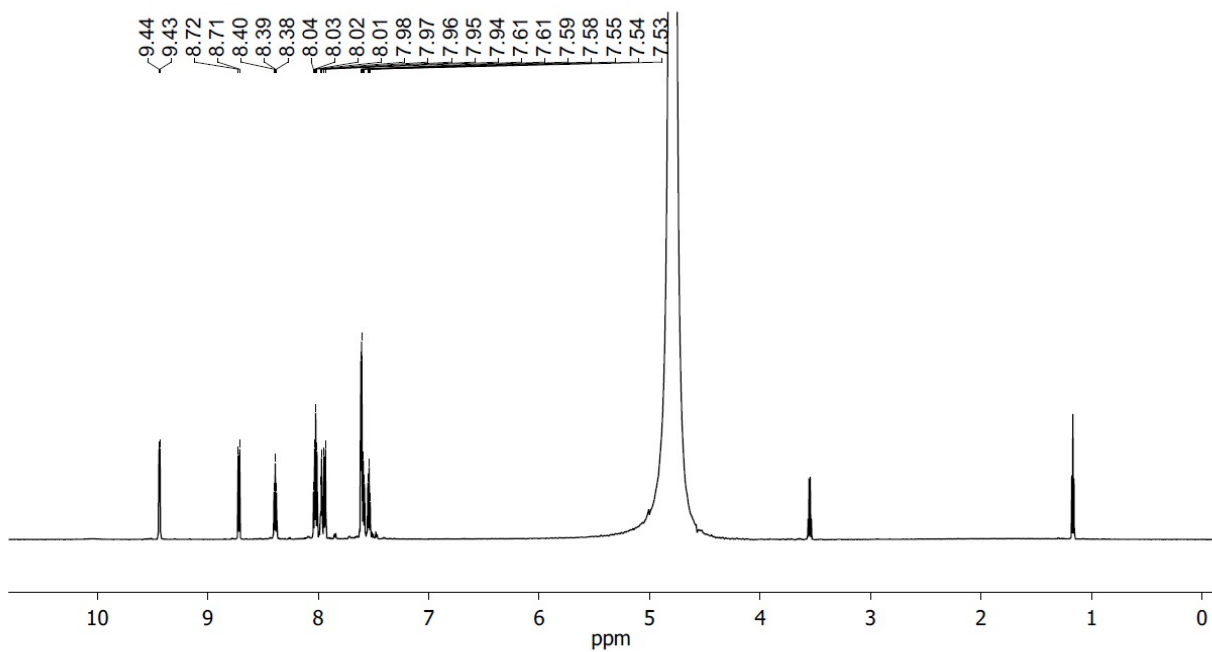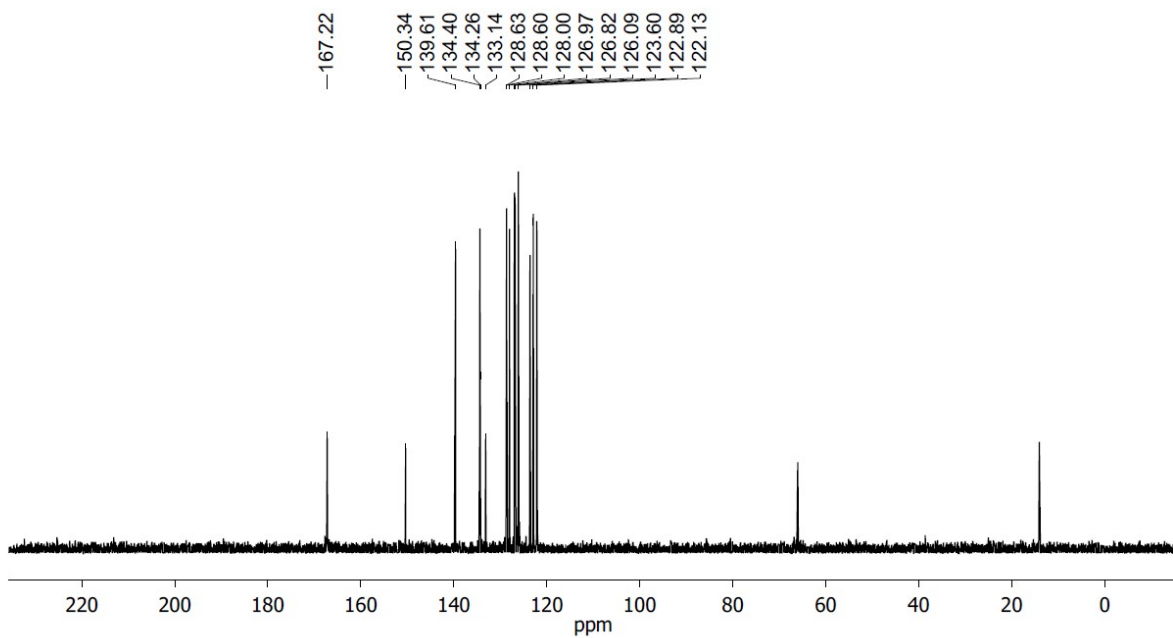

$^1\text{H}$  and  $^{13}\text{C}\{^1\text{H}\}$  NMR spectra of 4 ( $\text{D}_2\text{O}$ ).

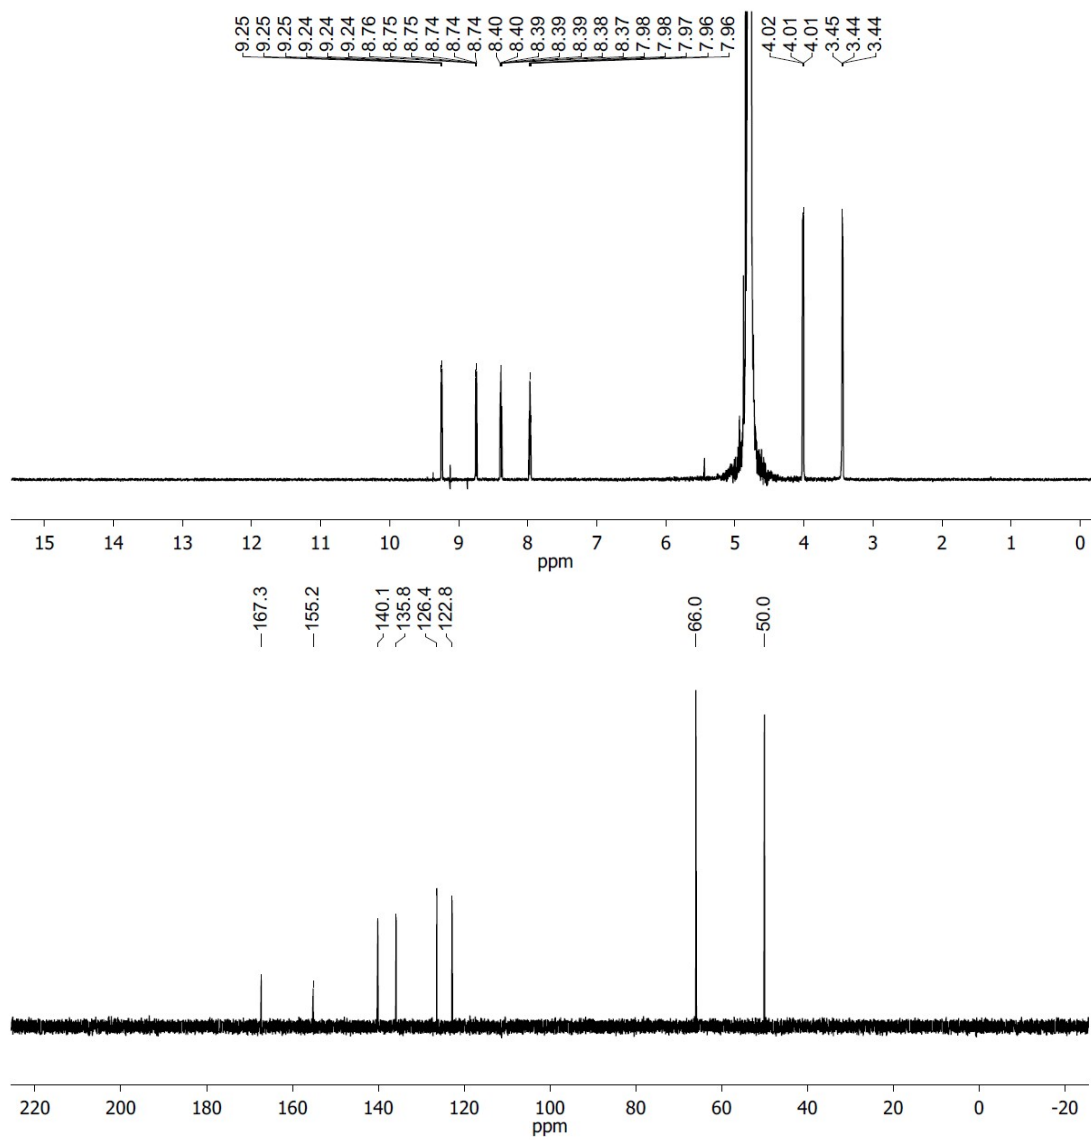

$^1H$  and  $^{13}C\{^1H\}$  NMR spectra of **5** ( $D_2O$ ).

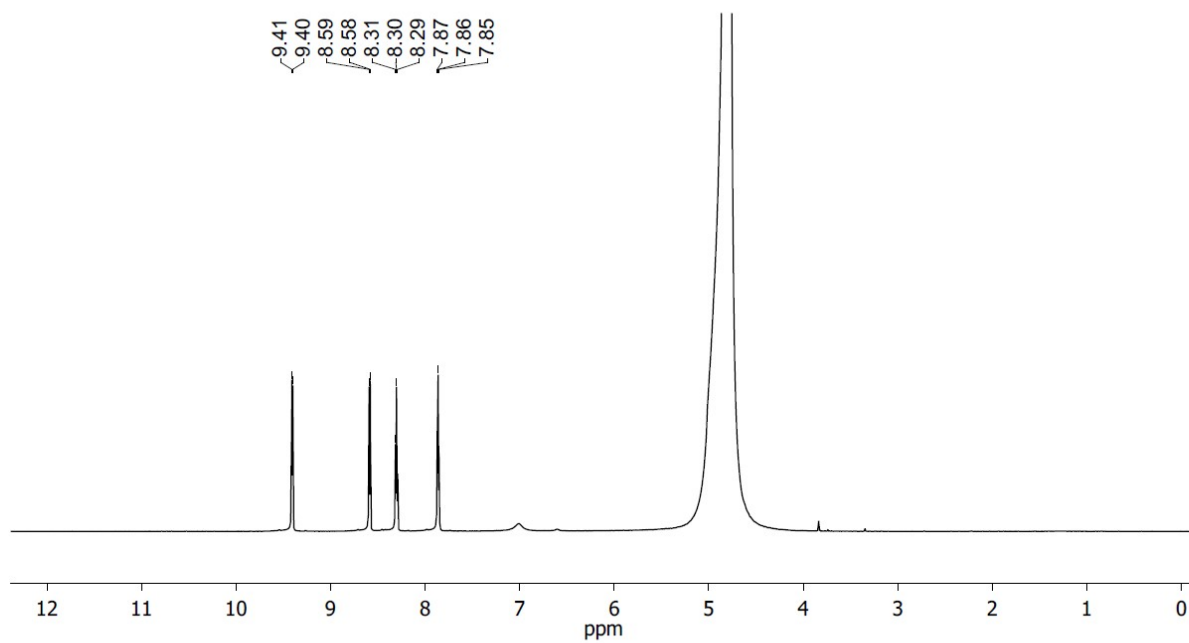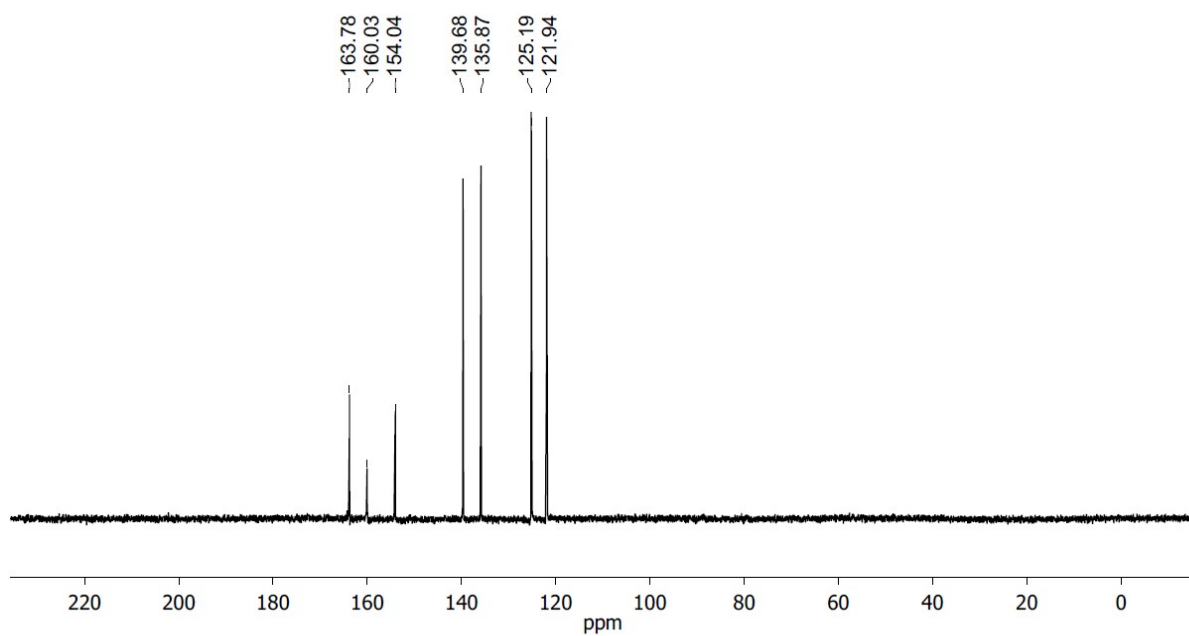

$^1\text{H}$  and  $^{13}\text{C}\{^1\text{H}\}$  NMR spectra of **6** ( $\text{D}_2\text{O}$ ).

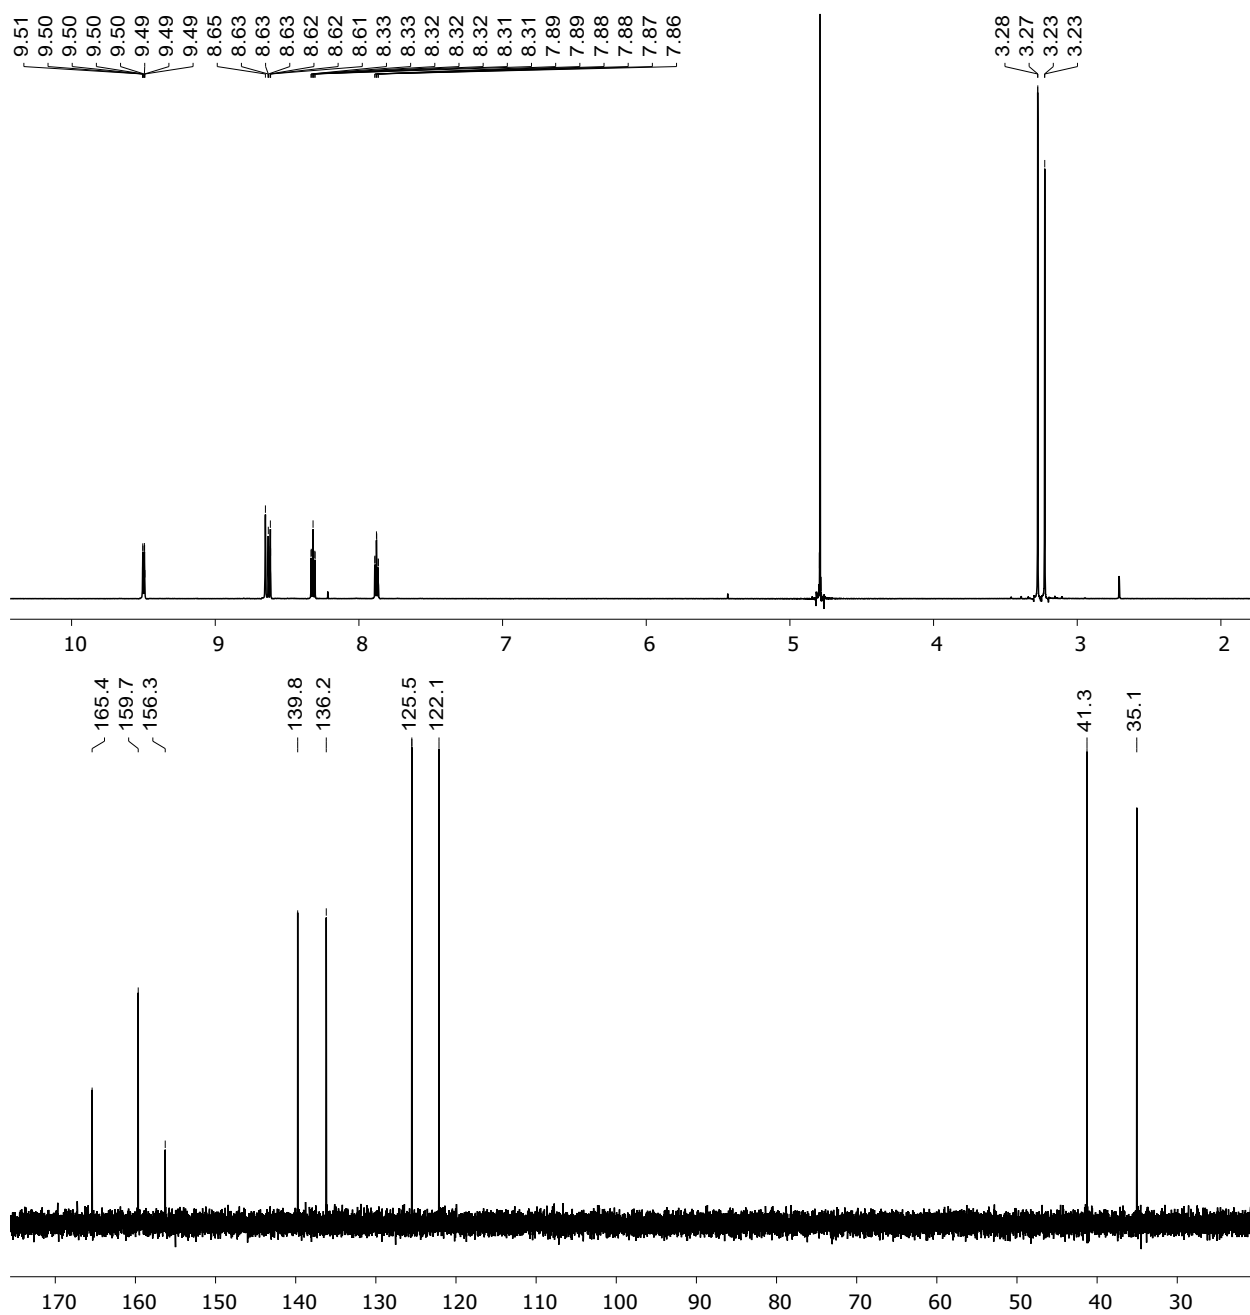

$^1H$  and  $^{13}C\{^1H\}$  NMR spectra of **7** ( $D_2O$ ).

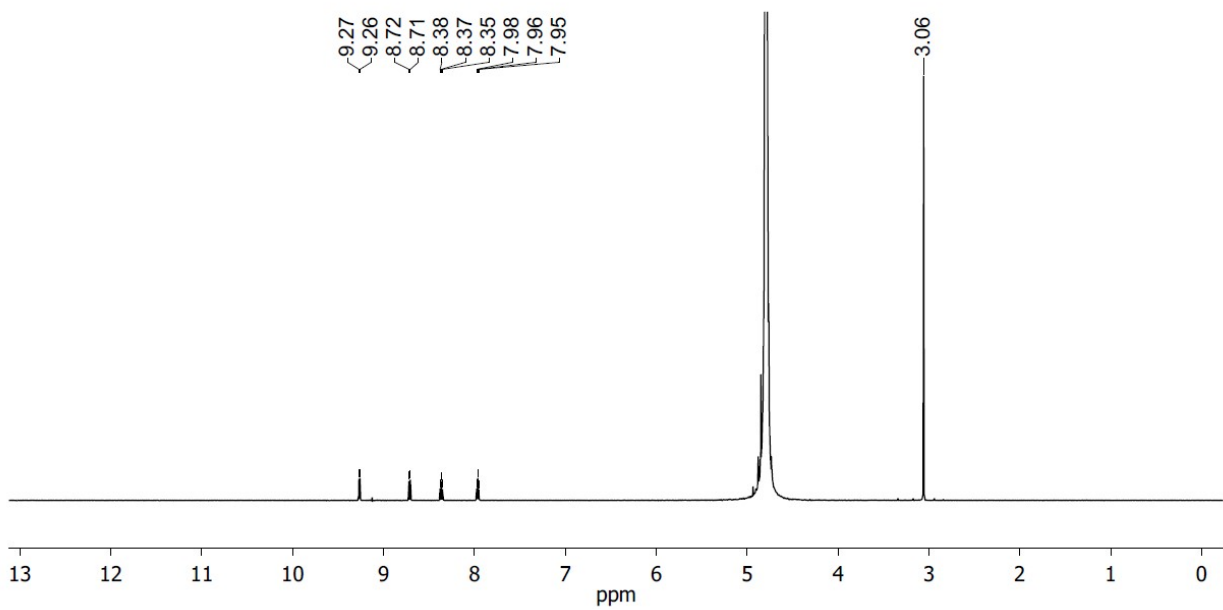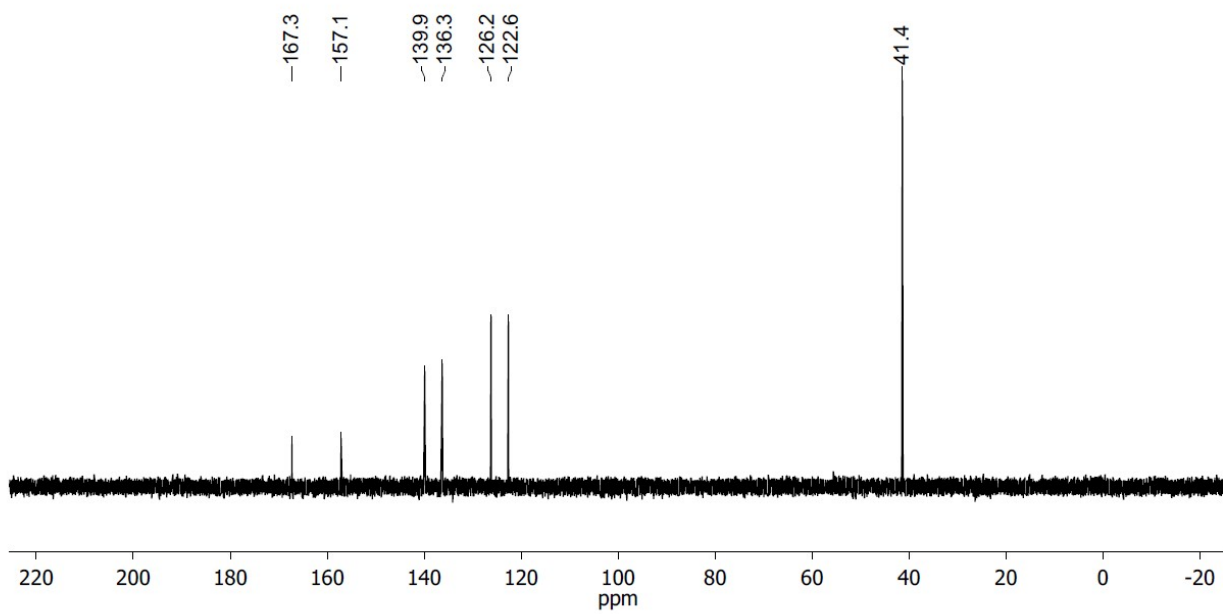

$^1\text{H}$  and  $^{13}\text{C}\{^1\text{H}\}$  NMR spectra of **8** ( $\text{D}_2\text{O}$ ).

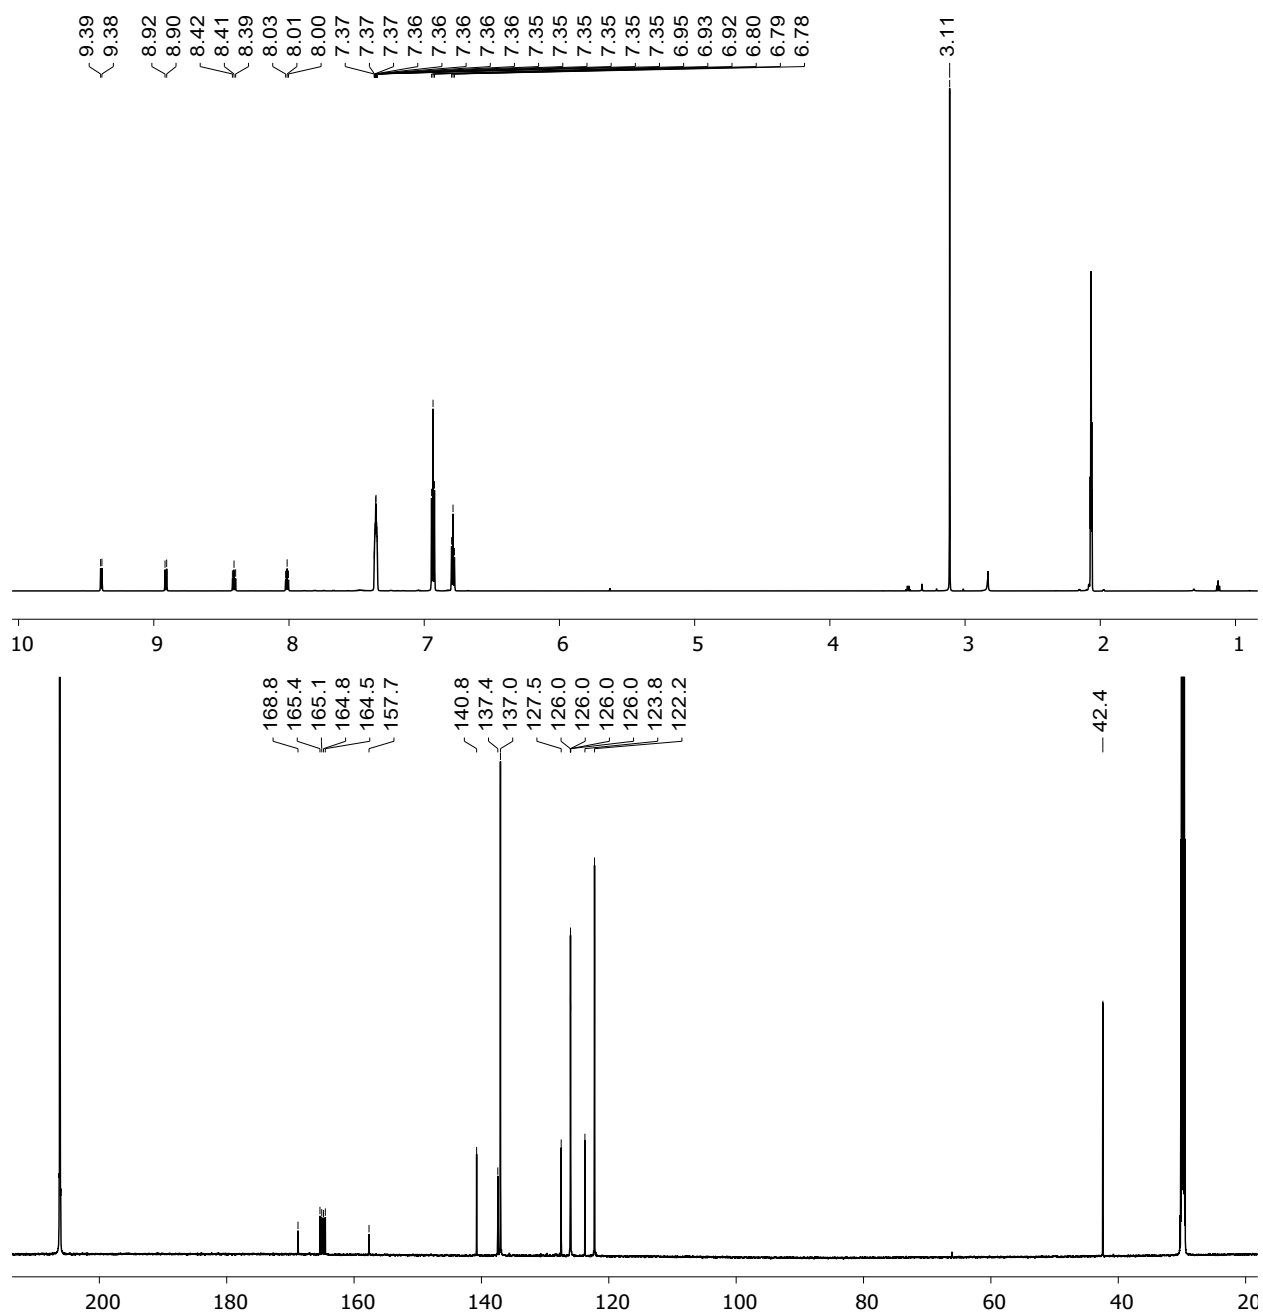

<sup>1</sup>H and <sup>13</sup>C{<sup>1</sup>H} NMR spectra of **9** (Me<sub>2</sub>CO).
